# Supplementary material for: Tungstic acid-functionalized MCM-41 as a novel mesoporous solid acid catalyst for the one-pot synthesis of new pyrrolo[2,1-a]isoquinolines
Source: Royal Society of Chemistry journal article supplement (doi:10.1039/c8nj02699h), 2018-01-01
Supplement: c8nj02699h1.pdf [file c8nj02699h1.pdf]

## Supporting Information

**Tungstic acid-functionalized MCM-41 as a novel mesoporous solid acid catalyst for one-pot synthesis of new pyrrolo[2,1-*a*]isoquinolines**

**Bahador Karami,\* Mahnaz Farahi, Sedigheh Akrami and Dawood Elhamifar**

*Department of Chemistry, Yasouj University, Yasouj, Iran, Zip Code: 75918-74831.*

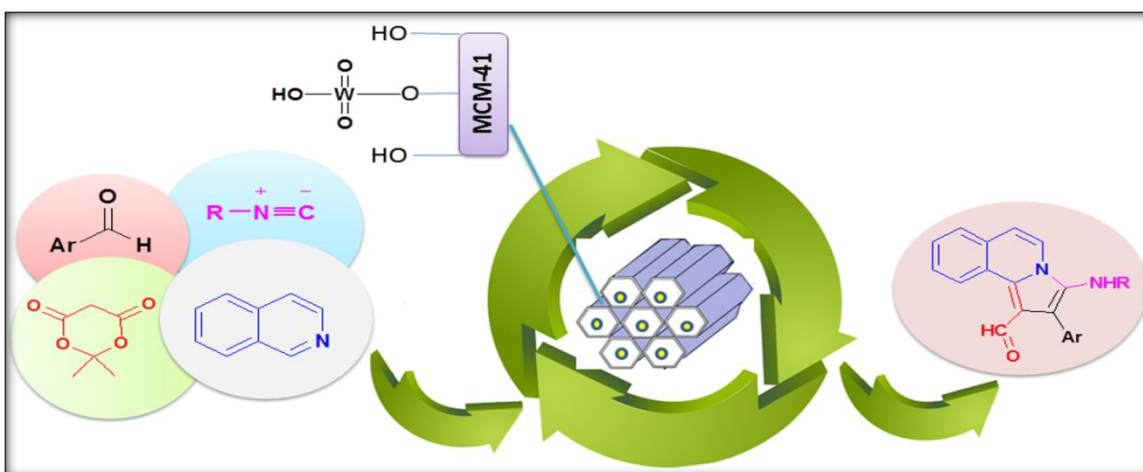

<sup>1</sup>H NMR (400 MHz, DMSO-d<sub>6</sub>)

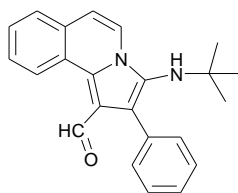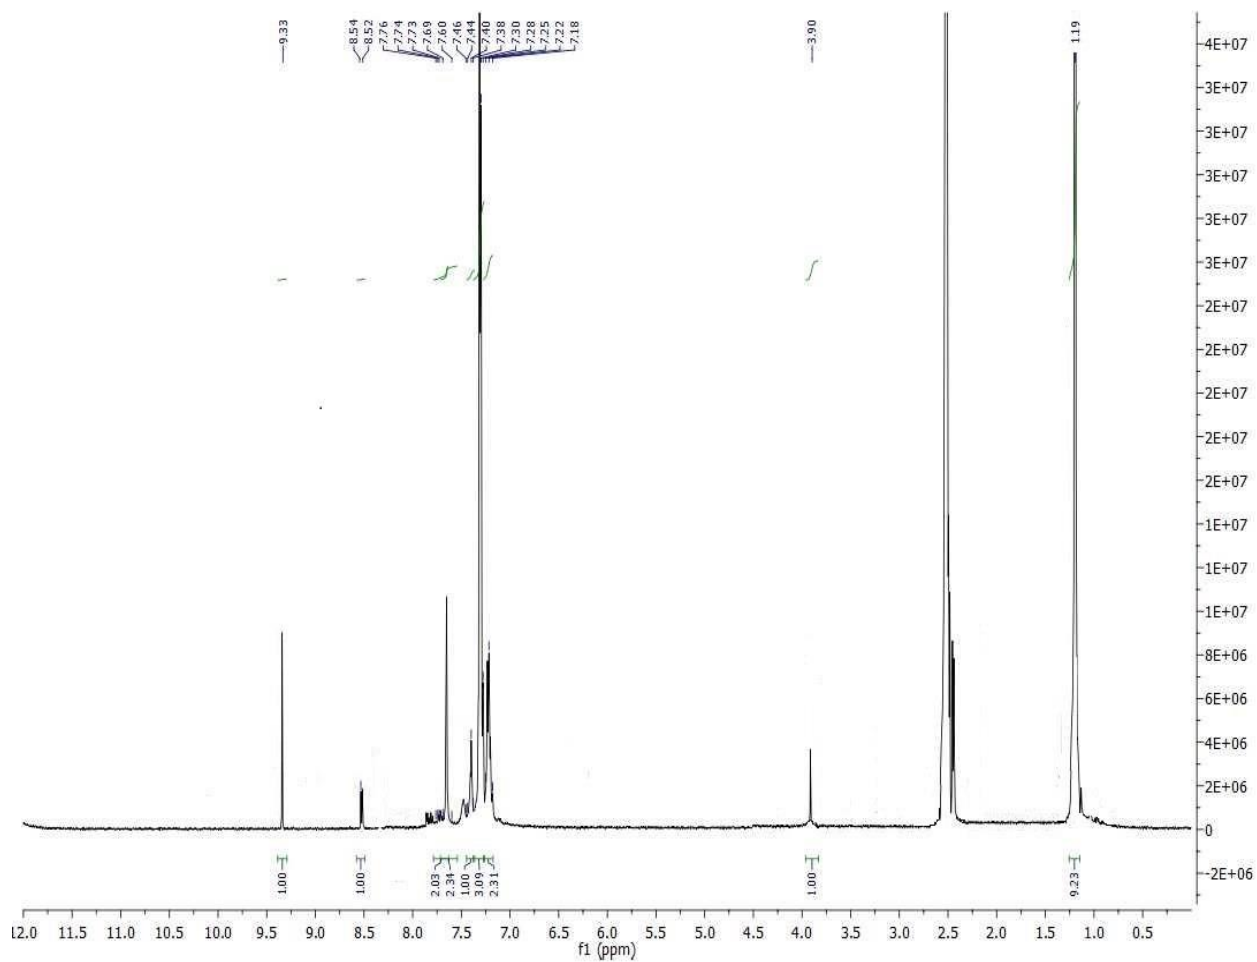

<sup>13</sup>C NMR (100 MHz, DMSO-d<sub>6</sub>)

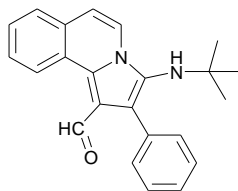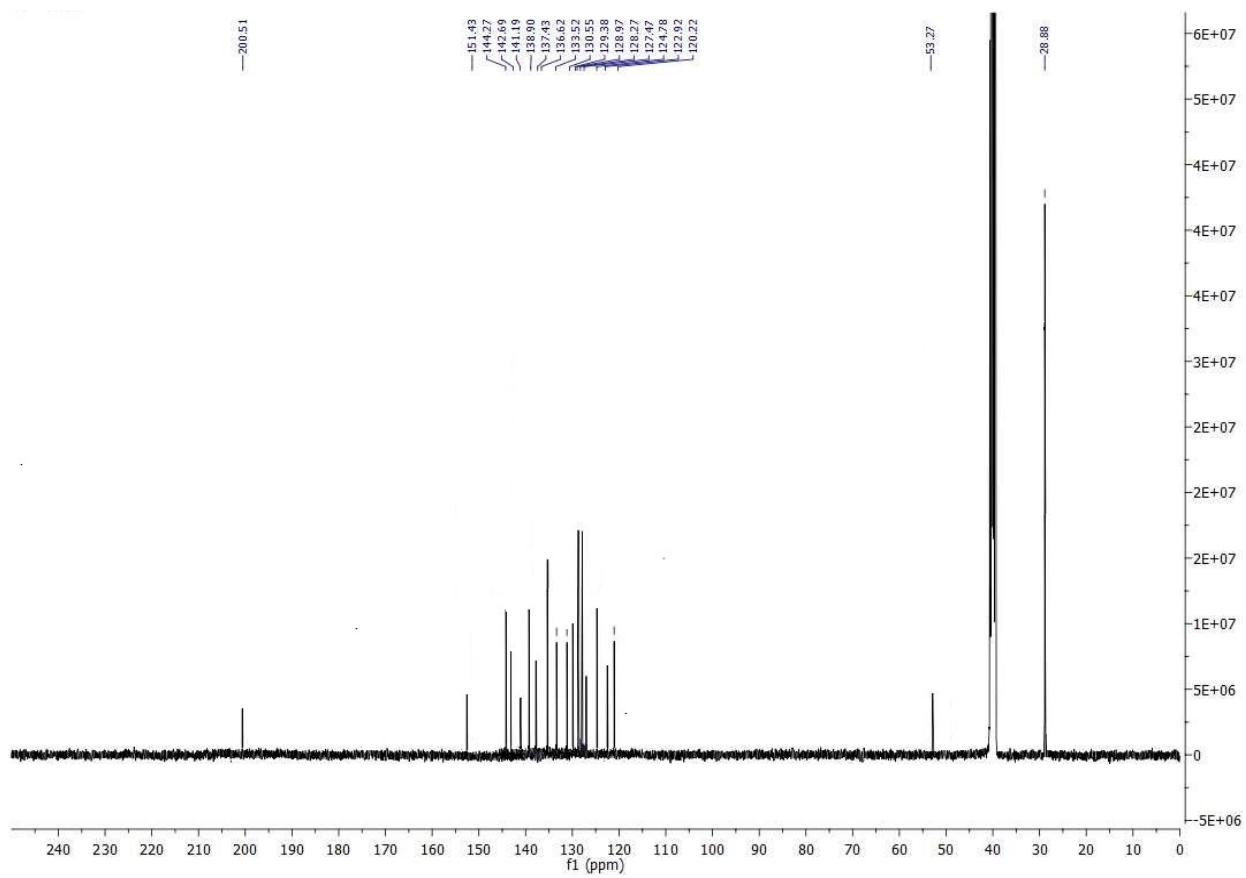

<sup>1</sup>H NMR (400 MHz, DMSO-d<sub>6</sub>)

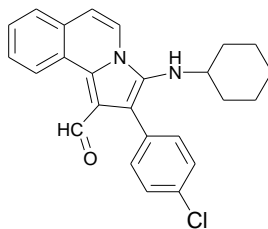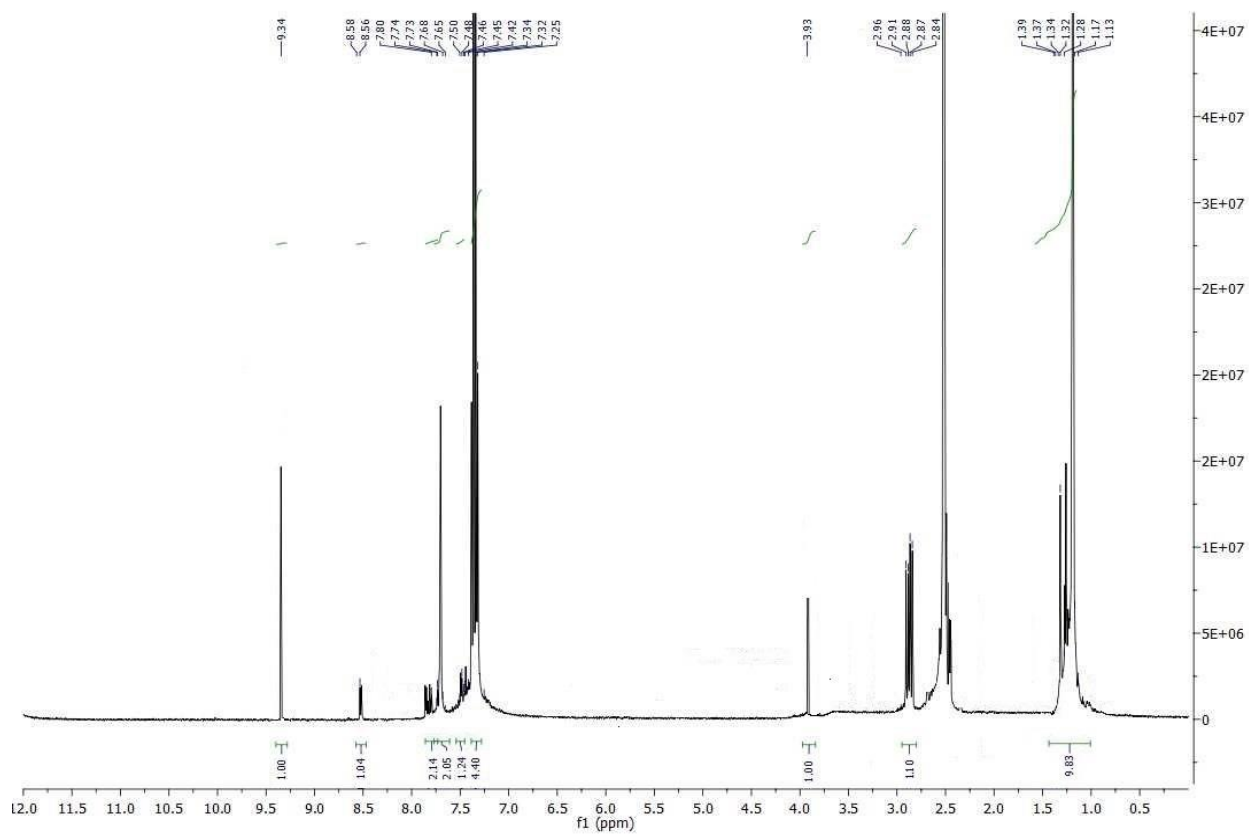

<sup>13</sup>C NMR (100 MHz, DMSO-d<sub>6</sub>)

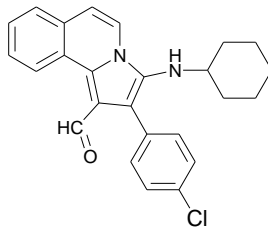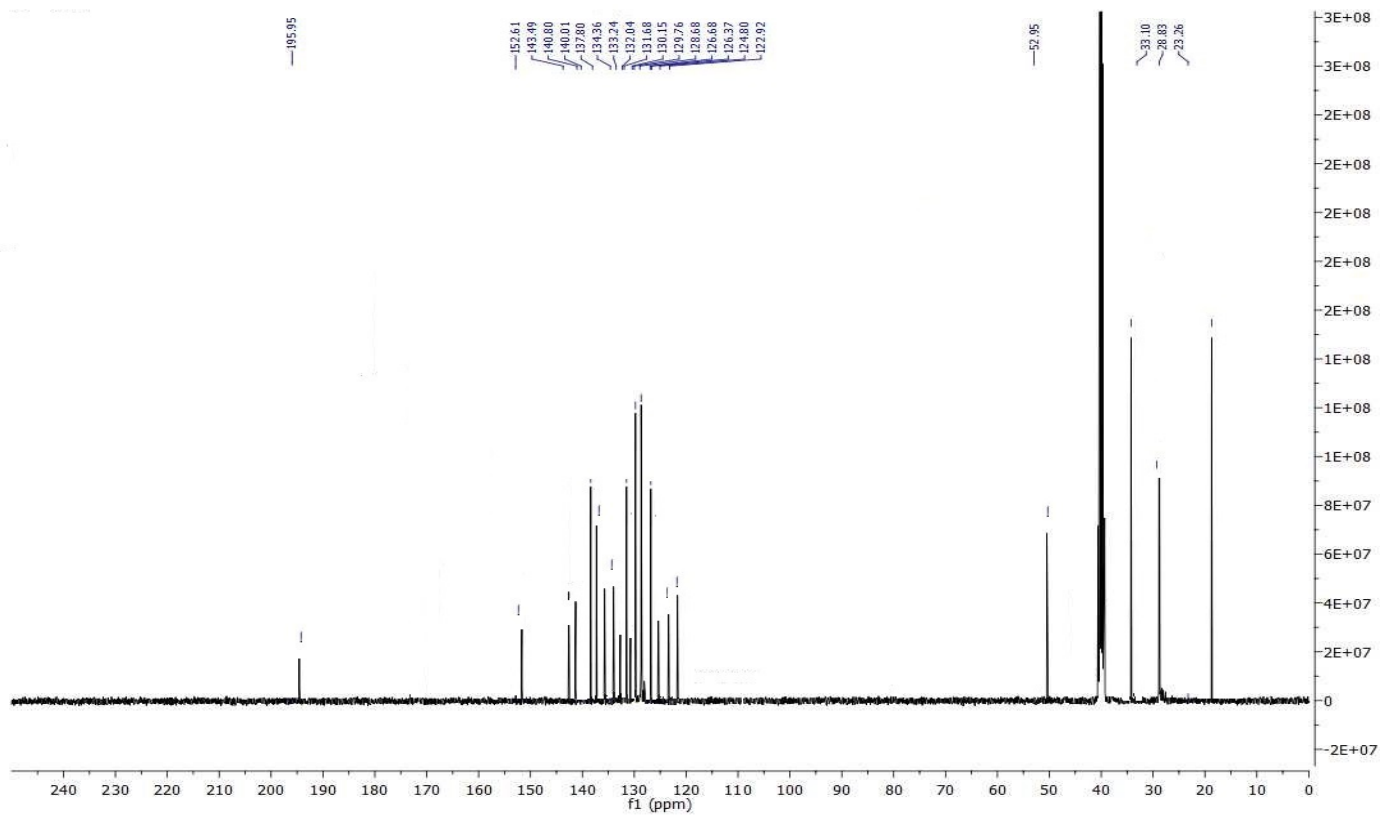

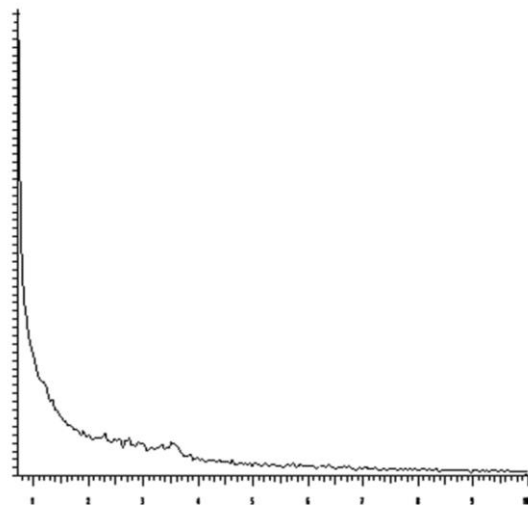

**Fig 1** XRD patterns of MCM-41-chloride.

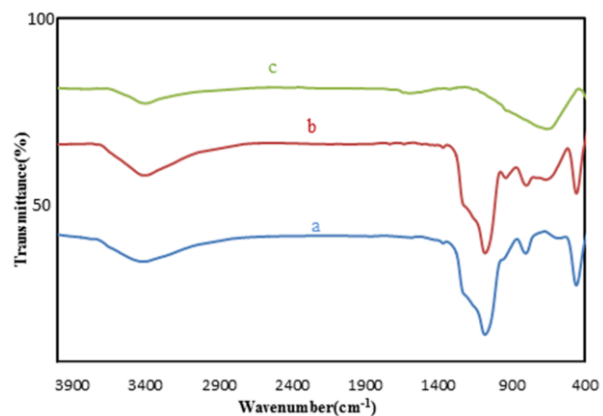

**Fig. 2** FT-IR spectra of a) MCM-41, b) MCM-41- $\text{H}_2\text{WO}_4$  and c)  $\text{H}_2\text{WO}_4$ .

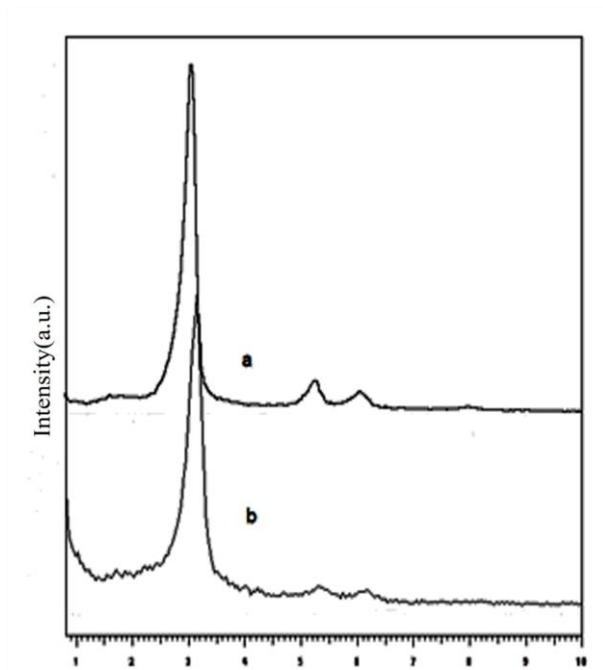

**Fig. 3** XRD patterns of a) MCM-41 and b) MCM-41-HWO<sub>4</sub>.

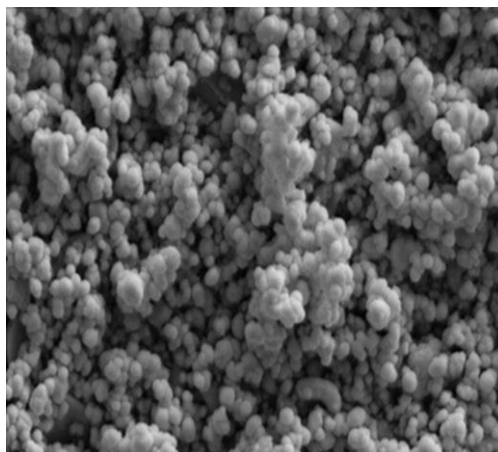

**Fig. 4** SEM image of MCM-41-HWO<sub>4</sub>.

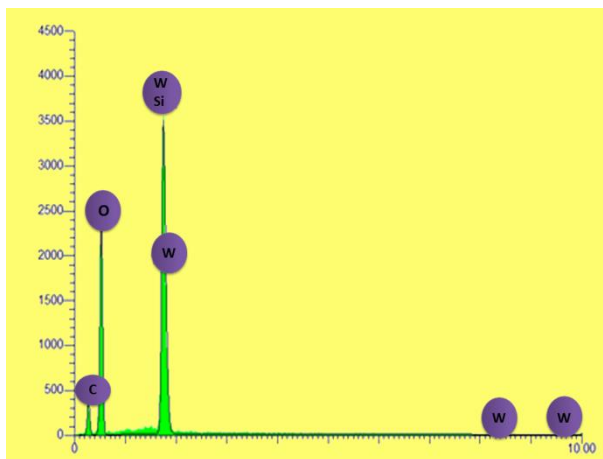

**Fig. 5** EDX spectrum of MCM-41-HWO<sub>4</sub>.

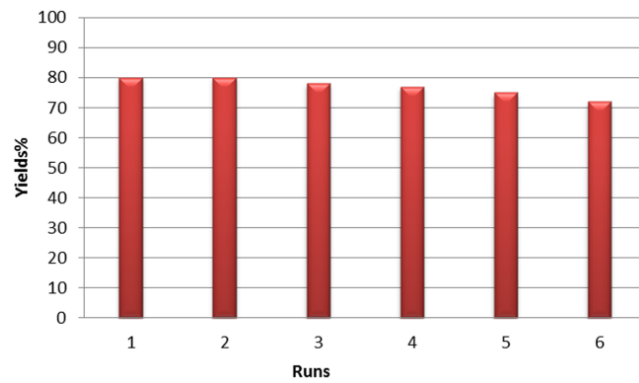

**Fig. 6** Reusability of the MCM-41-HWO<sub>4</sub> catalyst in the reaction of benzaldehyde, meldrum's acid, isoquinoline and *t*-butyl isocyanide.
